# Supplementary material for: Mesoporous sandwiches: towards mesoporous multilayer films of crystalline metal oxides
Source: Royal Society of Chemistry journal article supplement (doi:10.1039/b820651c), 2009-01-01
Supplement: b820651c.pdf [file b820651c.pdf]

## Supporting information

### Small-angle x-ray scattering (SAXS) of different combinations of metal oxide films

The SAXS data of the films in Fig. S1 were acquired in transmission mode, i.e. the angle of incidence between the incoming x-ray beam and the film surface was  $90^\circ$ . Thus, the 2D patterns reflect the in-plane mesoscopic order of the films. It is seen that after treatment at  $300^\circ\text{C}$ , i.e. at a temperature lower than the crystallization temperature of both oxides, the films generate a Bragg ring, corresponding to a well-ordered mesoporosity, except for the  $\text{WO}_3/\text{WO}_3/\text{WO}_3$ . Thus, the SAXS data show that an intermediate, mesostructured  $\text{TiO}_2$  layer is beneficial to keep mesostructural order in the  $\text{WO}_3$  films. In general, the signals similar to those of our previous publications on  $\text{WO}_3$  and  $\text{TiO}_2$  using the KLE template.

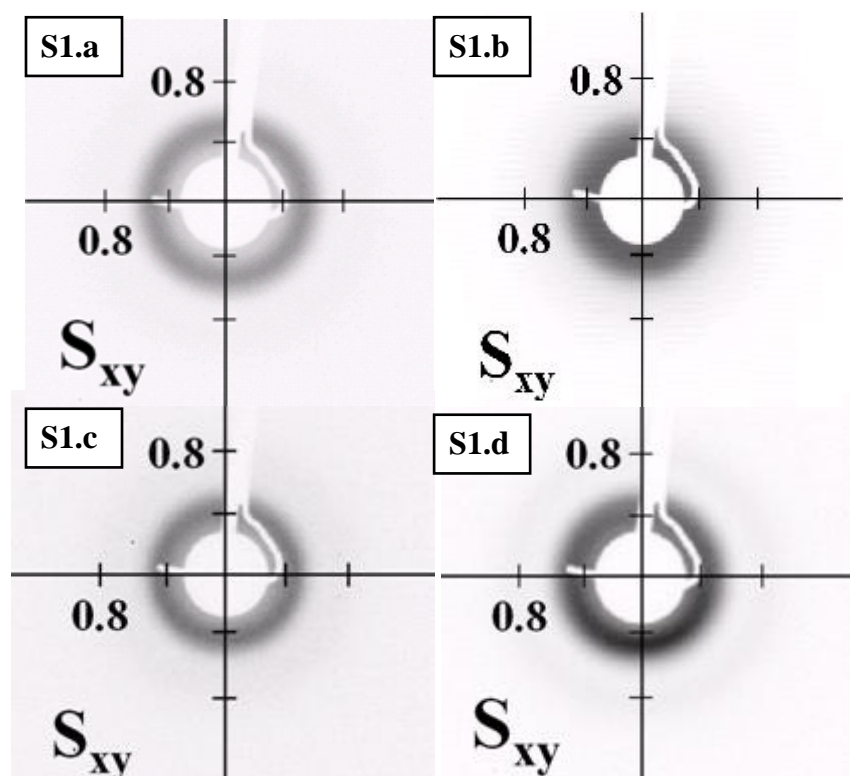

Figure S1: 2D-SAXS transmission of  $\text{WO}_3/\text{WO}_3$  (S1.a),  $\text{WO}_3/\text{WO}_3/\text{WO}_3$  (S1.b),  $\text{WO}_3/\text{TiO}_2$  (S1.c), and  $\text{WO}_3/\text{TiO}_2/\text{WO}_3$  (S1.d) after annealing at  $300^\circ\text{C}$ .

Figure S2 shows that already at an annealing at  $300^\circ\text{C}$  differences are seen in the mesostructure of multilayer films ( $\text{WO}_3/\text{WO}_3$  vs.  $\text{WO}_3$  films with  $\text{TiO}_2$  intermediate layers). At this temperature, the matrices are still amorphous, which shows that indeed the differences in the quality of the mesoscopic order are mainly due to the self-assembly process, and not the annealing: the films having a  $\text{TiO}_2$  sub- or intermediate layer show better mesoscopic order than those without such layers.

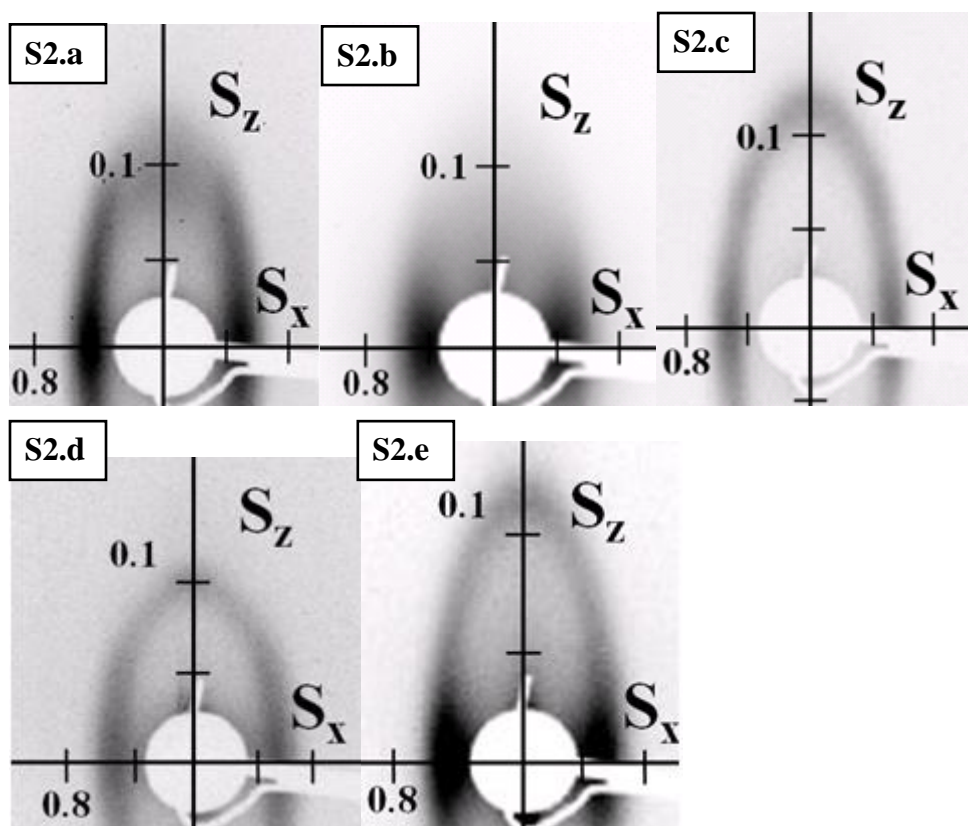

Figure S2: 2D-SAXS data (all of them are measured at an angle of incidence of  $10^\circ$  between the x-ray beam and the surface of the films) of  $\text{WO}_3/\text{WO}_3$  (S2.a),  $\text{WO}_3/\text{WO}_3/\text{WO}_3$  (S2.b),  $\text{TiO}_2/\text{WO}_3$  (S2.c),  $\text{WO}_3/\text{TiO}_2$  (S2.d) and  $\text{WO}_3/\text{TiO}_2/\text{WO}_3$  (S2.e) after annealing at  $300^\circ\text{C}$ .

Figure S3 shows that  $\text{WO}_3/\text{WO}_3/\text{WO}_3$  films prepared without  $\text{TiO}_2$  intermediate layers lose their mesoscopic order (Fig. a: transmission mode), while those with a  $\text{TiO}_2$  intermediate layer show good order even at elevated annealing temperature.

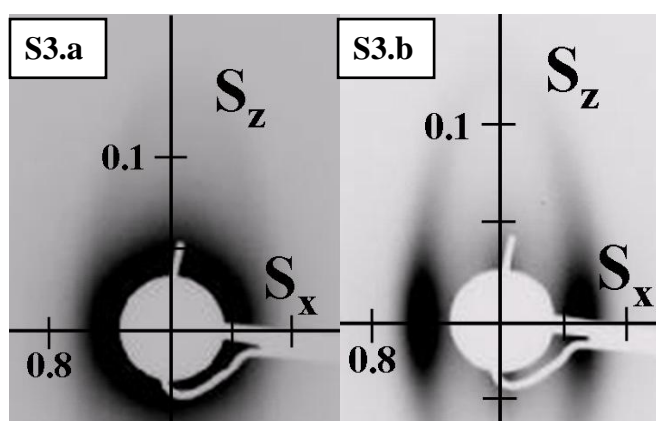

Figure S3: 2D-SAXS reflexion of  $\text{WO}_3/\text{WO}_3/\text{WO}_3$  (S3.a), and  $\text{WO}_3/\text{TiO}_2/\text{WO}_3$  (S3.b) after annealing at  $450^\circ\text{C}$  and  $550^\circ\text{C}$  respectively.

Figure S4: SEM of a  $\text{TiO}_2/\text{WO}_3$  film.

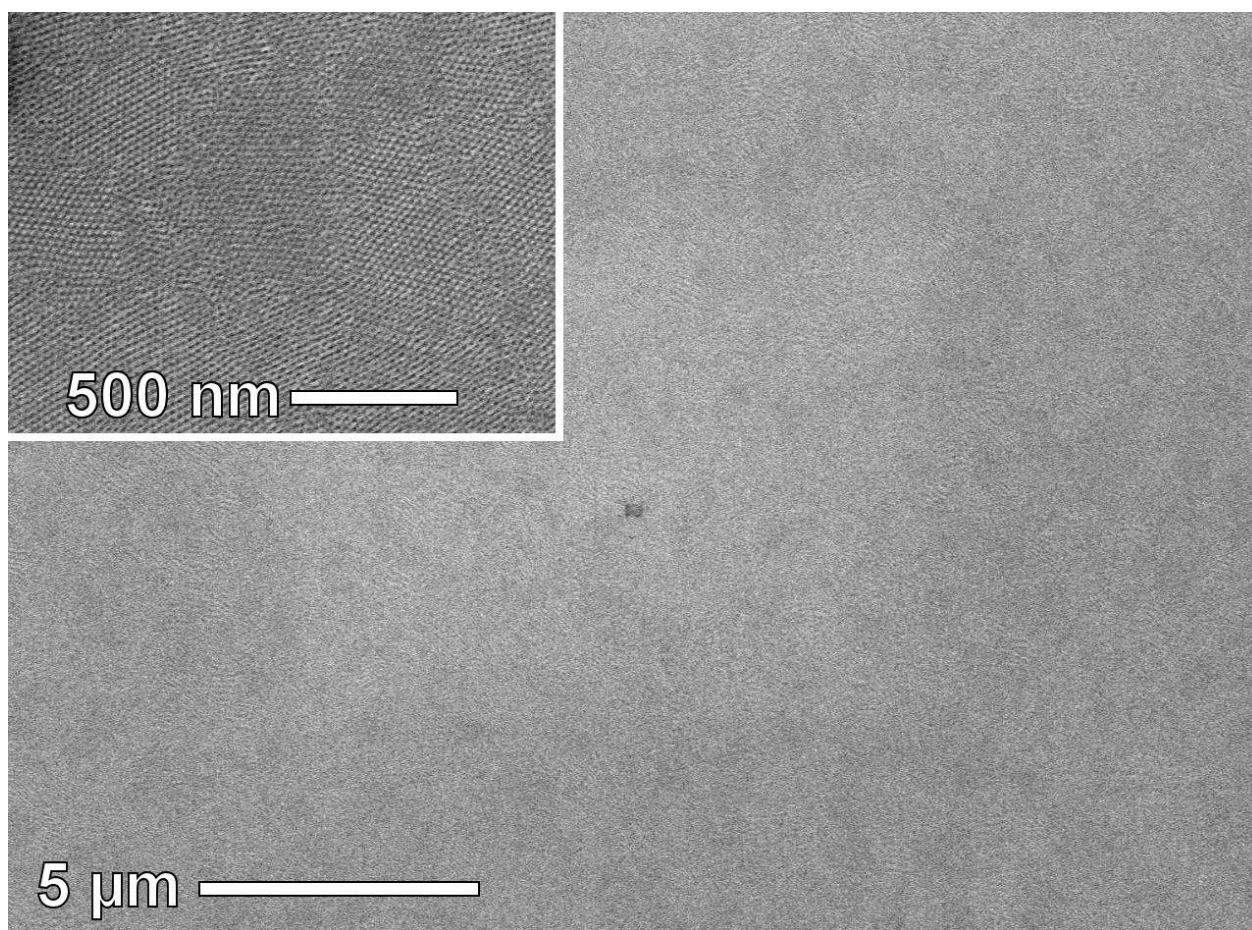

Figure S4 shows that the films are absolutely crack-free. The inset shows the mesopores on the surface.
